# Supplementary material for: Cyclic AMP Effectors in African Trypanosomes Revealed by Genome-Scale RNA Interference Library Screening for Resistance to the Phosphodiesterase Inhibitor CpdA
Source: PubMed Central journal article supplement (PMC3811416; doi:10.1128/aac.00508-13), 2013-10

**FIG. S1.** Schematic diagrams of *TbrPDEB1* and *TbrPDEB2* showing functional domains (grey boxes) and allelic polymorphisms in *T. b. brucei* strain Lister 427 and the Cpd A resistant R0.8 cell line. The ORFs are represented by the largest box (white and grey parts); flanking regions are represented by thick black horizontal lines. Allelic polymorphisms are represented by thin (single nucleotide) or thicker (clusters of multiple nucleotides) vertical lines.

**FIG. S2.** Western Blot analysis of CARP1 repression (1  $\mu$ g/ml tetracycline for 24h, + Tet) in additional *CARP1* RNAi cell lines with *in situ* tagged CARP1 either with an N-terminal 4xTy1 (upper panel) or a C-terminal 3xHA tag (lower panel). CARP1 protein levels were normalized to PFR-A/C detected by the monoclonal antibody L13D6 (36) and set to 100% in the absence of Tet. The relative scan gain in the 800 nm channel was set to 1 for the upper panel and to 3 for the lower panel. Relative expression levels are indicated as percentage of the non-induced cultures.

**FIG. S3.** *CARP1-4* mRNA expression levels in *T. b. brucei* strain Lister 427 wild type (WT) and derived R0.8 cell line in the presence or absence of Cpd A, determined by quantitative real-time PCR. Relative expression normalized to *TERT* as reference gene (37) and the wild type line is given with standard error (SEM) of three biological replicates.

# S1 Allelic Polymorphisms of *TbrPDEB1*

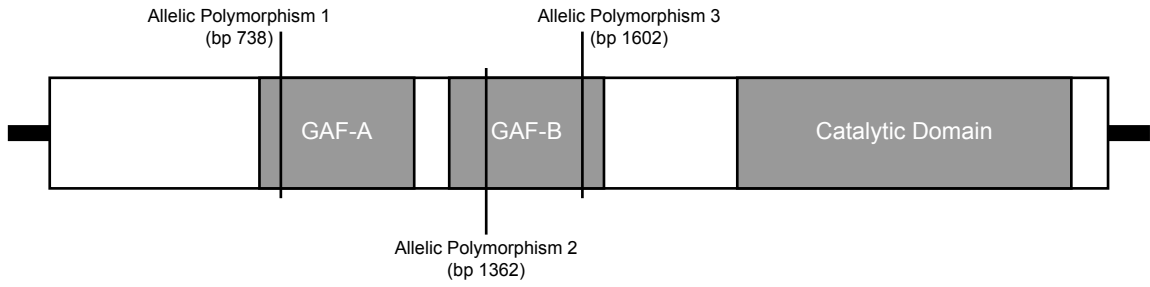

# Allelic Polymorphisms of *TbrPDEB2*

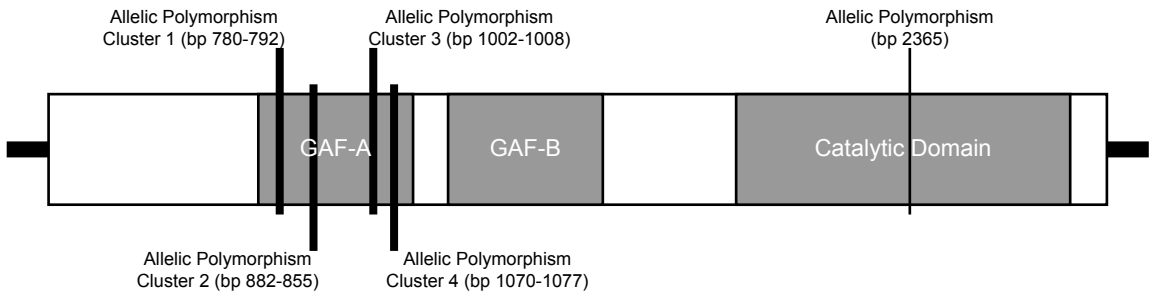

**S2****CARP1 RNAi / p3077 CARP1 (*in situ* N-terminal 4xty1)**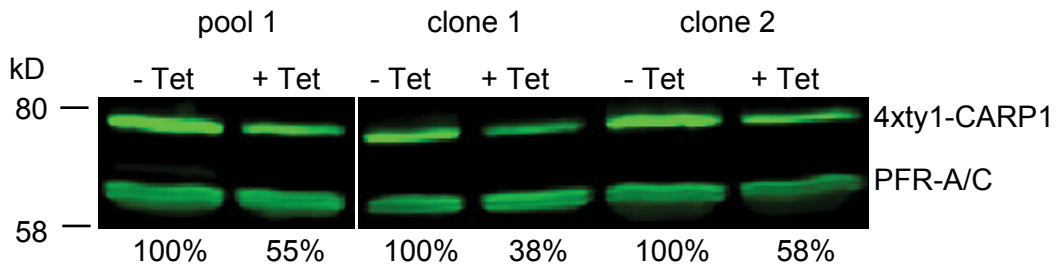**CARP1 RNAi / pMOTag2H CARP1 (*in situ* C-terminal 3xHA)**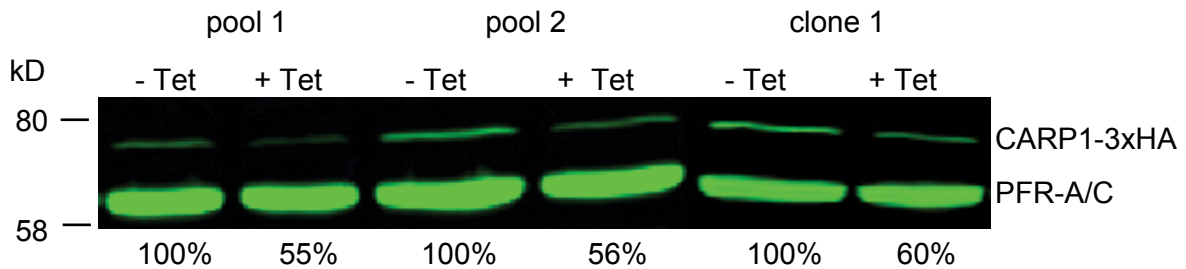

**S3**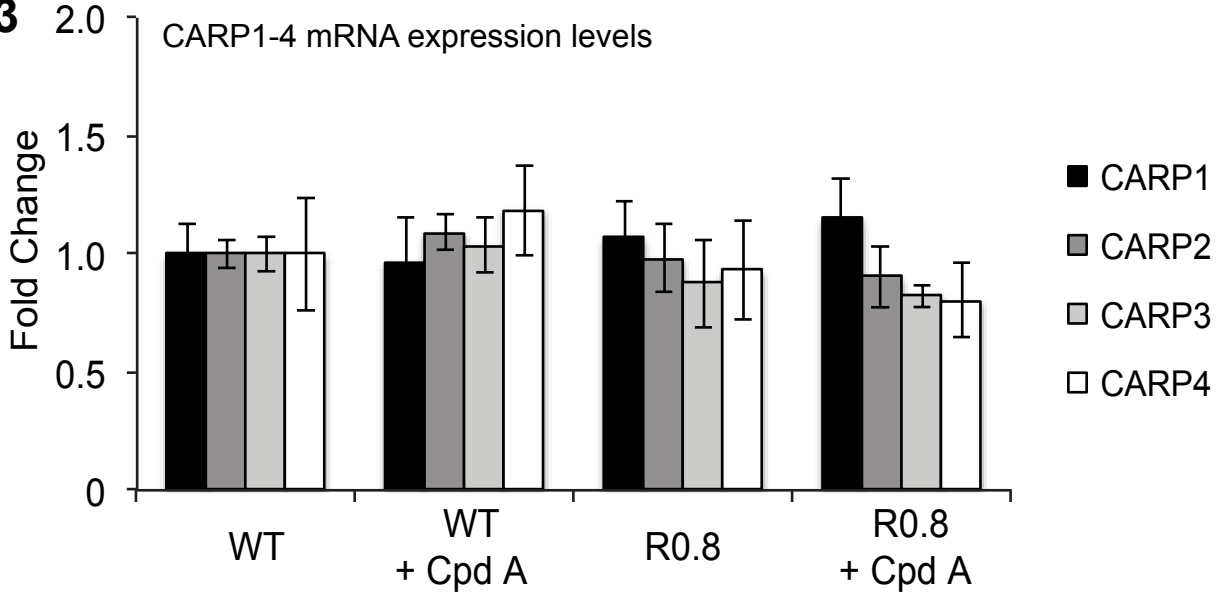

Supplement: AAC.00508-13_zac010132207so1.pdf [file AAC.00508-13_zac010132207so1.pdf]
